# Supplementary material for: Experimental Study of High Temperature Phase Equilibria in the Iron-Rich Part of the Fe-P and Fe-C-P Systems
Source: Springer Nature journal article supplement (doi:10.1007/s11661-020-05912-z), 2020-07-23
Supplement: MOESM1 [file 18211200]

**Supplementary material for:**

**Experimental study of high temperature phase equilibria in the iron-rich part of the Fe-P and Fe-C-P systems**

Michael Bernhard <sup>a,\*</sup>, Peter Presoly <sup>a</sup>, Nora Fuchs <sup>a</sup>, Christian Bernhard <sup>a</sup> and Youn-Bae Kang <sup>b</sup>

<sup>a</sup> Chair of Ferrous Metallurgy, Montanuniversitaet Leoben, Franz-Josef-Strasse 18, 8700 Leoben, Austria

<sup>b</sup> Graduate Institute of Ferrous Technology, Pohang University of Science and Technology, Kyungbuk 37673, Pohang, Republic of Korea

\* corresponding author, e-mail: [michael.bernhard@unileoben.ac.at](mailto:michael.bernhard@unileoben.ac.at), tel: +43-3842-402-2210

**Table S-I:** Detailed chemical analysis of investigated samples and phase transformation temperatures below 1000 °C; Fe-P, Fe-C-0.1%P, Fe-0.20%C-P

| Alloy   | Fe wt%   | C wt%        | Si wt% | Mn wt% | P wt%        | S wt%  | Al wt% | N wt%   | Curie [°C] | Std. Dev. [°C] | Typ. Err. [°C] | $\gamma$ -Form. [°C] | Std. Dev. [°C] | Typ. Err. [°C] | $\alpha$ -End [°C] | Std. Dev. [°C] | Typ. Err. [°C] |
|---------|----------|--------------|--------|--------|--------------|--------|--------|---------|------------|----------------|----------------|----------------------|----------------|----------------|--------------------|----------------|----------------|
| A-I     | 99.9085  | 0.008        | 0.002  | 0.014  | <b>0.026</b> | 0.0034 | 0.012  | 0.0021  | 765.9      | 0.3            | 2              | n.m.                 | -              | -              | 924.4              | 0.3            | 5              |
| A-II    | 99.9009  | 0.006        | 0.002  | 0.015  | <b>0.044</b> | 0.0032 | 0.002  | 0.0028  | 765.2      | 0.6            | 2              | n.m.                 | -              | -              | 937.0              | 2.3            | 5              |
| A-III   | 99.8304  | 0.008        | 0.002  | 0.013  | <b>0.102</b> | 0.0033 | 0.015  | 0.0025  | 763.8      | 0.1            | 2              | n.m.                 | -              | -              | 958.2              | 0.7            | 5              |
| A-IV    | 99.7456  | 0.008        | 0.0025 | 0.021  | <b>0.147</b> | 0.0036 | 0.037  | 0.0021  | 767.0      | 0              | 2              | n.m.                 | -              | -              | 999.4              | 0.1            | 5              |
| A-V     | 99.616   | 0.006        | 0.003  | 0.014  | <b>0.322</b> | 0.0033 | 0.01   | 0.0021  | 757.2      | 0.1            | 2              | n.m.                 | -              | -              | n.p.               | -              | -              |
| A-VI    | 99.46625 | 0.008        | 0.004  | 0.031  | <b>0.419</b> | 0.0034 | 0.032  | 0.00225 | 758.5      | 0.1            | 2              | n.m.                 | -              | -              | n.p.               | -              | -              |
| A-VII   | 99.4396  | 0.008        | 0.003  | 0.016  | <b>0.480</b> | 0.0036 | 0.022  | 0.0025  | 756.9      | 0.1            | 2              | n.m.                 | -              | -              | n.p.               | -              | -              |
| A-VIII  | 99.2616  | 0.007        | 0.003  | 0.015  | <b>0.660</b> | 0.0036 | 0.023  | 0.0024  | 751.8      | 0.4            | 2              | n.m.                 | -              | -              | n.p.               | -              | -              |
| A-IX    | 99.2345  | 0.007        | 0.002  | 0.016  | <b>0.700</b> | 0.0032 | 0.007  | 0.0083  | 751.6      | 0.1            | 2              | n.p.                 | -              | -              | n.p.               | -              | -              |
| A-X     | 98.89275 | 0.008        | 0.0055 | 0.0515 | <b>0.970</b> | 0.0035 | 0.031  | 0.00215 | 742.7      | 0.2            | 2              | n.p.                 | -              | -              | n.p.               | -              | -              |
| A-XI    | 98.7513  | 0.008        | 0.002  | 0.016  | <b>1.180</b> | 0.0035 | 0.01   | 0.0075  | 738.5      | 0.3            | 2              | n.p.                 | -              | -              | n.p.               | -              | -              |
| A-XII   | 97.9618  | 0.004        | 0.004  | 0.012  | <b>1.980</b> | 0.0033 | 0.009  | 0.0026  | 720.1      | 0              | 2              | n.p.                 | -              | -              | n.p.               | -              | -              |
| A-XIII  | 97.6286  | 0.009        | 0.002  | 0.016  | <b>2.300</b> | 0.0033 | 0.015  | 0.0054  | 721.5      | 0.8            | 2              | n.p.                 | -              | -              | n.p.               | -              | -              |
| A-XIV   | 96.2174  | 0.011        | 0.002  | 0.015  | <b>3.700</b> | 0.0033 | 0.028  | 0.0048  | 745.9      | 0.9            | 2              | n.p.                 | -              | -              | n.p.               | -              | -              |
| A-XV    | 94.0626  | 0.008        | 0.001  | 0.014  | <b>5.870</b> | 0.0034 | 0.012  | 0.0114  | 748.6      | 0              | 2              | n.p.                 | -              | -              | n.p.               | -              | -              |
| A-XVI   | 93.4959  | 0.017        | n.m.   | n.m.   | <b>6.480</b> | 0.0046 | n.m.   | 0.0025  | 748.5      | 0              | 2              | n.p.                 | -              | -              | n.p.               | -              | -              |
| A-XVII  | 92.4061  | 0.017        | n.m.   | n.m.   | <b>7.570</b> | 0.0051 | n.m.   | 0.0018  | 748.5      | 0.2            | 2              | n.p.                 | -              | -              | n.p.               | -              | -              |
| A-XVIII | 90.8953  | 0.017        | n.m.   | n.m.   | <b>9.080</b> | 0.0055 | n.m.   | 0.0022  | 748.6      | 0.1            | 2              | n.p.                 | -              | -              | n.p.               | -              | -              |
| B-I     | 99.7881  | <b>0.004</b> | 0.014  | 0.058  | <b>0.107</b> | 0.0046 | 0.003  | 0.0019  | 766.2      | 0.9            | 2              | n.p.                 | -              | 5              | 966.5              | 3.5            | 5              |
| B-II    | 99.7572  | <b>0.033</b> | 0.014  | 0.06   | <b>0.106</b> | 0.0045 | 0.003  | 0.0023  | 765.6      | 0.1            | 2              | 733.2                | 0.4            | 5              | 929.1              | 0.1            | 5              |
| B-III   | 99.7179  | <b>0.059</b> | 0.015  | 0.064  | <b>0.108</b> | 0.0051 | 0.008  | 0.002   | 763.2      | 0.3            | 2              | 731.9                | 0.7            | 5              | 911.7              | 1              | 5              |
| B-IV    | 99.6626  | <b>0.099</b> | 0.014  | 0.06   | <b>0.110</b> | 0.0044 | 0.003  | 0.029   | 765.1      | 0.3            | 2              | 733.5                | 0.1            | 5              | n.m.               | -              | -              |
| B-V     | 99.6862  | <b>0.096</b> | 0.018  | 0.068  | <b>0.101</b> | 0.0052 | 0.004  | 0.0016  | 764.5      | 0              | 2              | 734.3                | 0              | 5              | n.m.               | -              | -              |
| B-VI    | 99.6511  | <b>0.136</b> | 0.015  | 0.057  | <b>0.105</b> | 0.0045 | 0.012  | 0.0014  | 765.7      | 0.2            | 2              | 738.4                | 1.8            | 5              | n.m.               | -              | -              |

**Table S-I** (continued)

| Alloy  | Fe wt%  | C wt%        | Si wt% | Mn wt% | P wt%        | S wt%  | Al wt% | N wt%  | Curie [°C] | Std. Dev. [°C] | Typ. Err. [°C] | $\gamma$ -Form. [°C] | Std. Dev. [°C] | Typ. Err. [°C] | $\alpha$ -End [°C] | Std. Dev. [°C] | Typ. Err. [°C] |
|--------|---------|--------------|--------|--------|--------------|--------|--------|--------|------------|----------------|----------------|----------------------|----------------|----------------|--------------------|----------------|----------------|
| B-VII  | 99.5924 | <b>0.203</b> | 0.013  | 0.059  | <b>0.106</b> | 0.0043 | 0.003  | 0.0013 | 766.1      | 0.3            | 2              | 732.8                | 0              | 5              | n.m.               | -              | -              |
| B-VIII | 97.5497 | <b>0.296</b> | 0.014  | 0.06   | <b>0.110</b> | 0.0046 | 0.006  | 0.0007 | 765.2      | 0.2            | 2              | 732.0                | 0.1            | 5              | n.m.               | -              | -              |
| B-IX   | 99.4059 | <b>0.378</b> | 0.014  | 0.063  | <b>0.106</b> | 0.0047 | 0.007  | 0.0014 | n.m.       | -              | 2              | 735.0                | 0              | 5              | n.m.               | -              | -              |
| B-X    | 99.1619 | <b>0.690</b> | 0.001  | 0.015  | <b>0.099</b> | 0.0031 | 0.004  | 0.003  | n.m.       | -              | 2              | 729.2                | 0.1            | 5              | n.m.               | -              | -              |
| B-XI   | 98.8457 | <b>1.000</b> | 0.001  | 0.015  | <b>0.099</b> | 0.0033 | 0.01   | 0.003  | n.m.       | -              | 2              | 729.9                | 0.4            | 5              | n.m.               | -              | -              |
| B-XII  | 98.4577 | <b>1.380</b> | 0.001  | 0.017  | <b>0.101</b> | 0.0033 | 0.014  | 0.003  | n.m.       | -              | 2              | 733.4                | 0.9            | 5              | n.m.               | -              | -              |
| C-I    | 99.6433 | <b>0.206</b> | 0.017  | 0.068  | <b>0.057</b> | 0.0049 | 0.002  | 0.0018 | 765.9      | 0              | 2              | 730.7                | 0.1            | 5              | n.m.               | -              | -              |
| C-II   | 99.6044 | <b>0.199</b> | 0.017  | 0.068  | <b>0.103</b> | 0.0047 | 0.002  | 0.0019 | 766.0      | 0.1            | 2              | 731.4                | 0.1            | 5              | n.m.               | -              | -              |
| C-III  | 99.5436 | <b>0.203</b> | 0.017  | 0.07   | <b>0.158</b> | 0.0046 | 0.002  | 0.0018 | 764.4      | 0.1            | 2              | 733.4                | 0.1            | 5              | n.m.               | -              | -              |

**Table S-II:** High temperature phase transformation temperatures of investigated samples higher 1000 °C; Fe-P, Fe-C-0.1%P, Fe-0.20%C-P

| Alloy  | $\delta$ -Form. [°C] | Std. Dev. [°C] | Typ. Err. [°C] | $\gamma$ -End [°C] | Std. Dev. [°C] | Typ. Err. [°C] | L-Form. [°C] | Std. Dev. [°C] | Typ. Err. [°C] | Liquidus [°C] | Std. Dev. [°C] | Typ. Error [°C] | Phase transf. |
|--------|----------------------|----------------|----------------|--------------------|----------------|----------------|--------------|----------------|----------------|---------------|----------------|-----------------|---------------|
| A-I    | 1389.4               | 1.5            | 5              | 1400.3             | 1.5            | 10             | 1527.5       | 0.4            | 2              | 1535.1        | 0              | 2               | left of cA    |
| A-II   | 1377.7               | 0.7            | 5              | 1385.9             | 0.6            | 10             | 1523.8       | 0.1            | 2              | 1534.9        | 0              | 2               | left of cA    |
| A-III  | 1367.7               | 1.1            | 5              | 1380.8             | 1.5            | 10             | 1513.3       | 1              | 2              | 1532.4        | 0.1            | 2               | left of cA    |
| A-IV   | 1341.9               | 0.8            | 5              | 1359.0             | 0              | 10             | 1504.7       | 1.9            | 2              | 1529.1        | 0              | 2               | left of cA    |
| A-V    | n.p.                 | -              | -              | 1320.2             | 1              | 10             | 1474.6       | 0.3            | 2              | 1525.3        | 0.2            | 2               | -             |
| A-VI   | n.p.                 | -              | -              | 1272.4             | 0              | 10             | 1454.0       | 0.4            | 2              | 1520.5        | 0              | 2               | -             |
| A-VII  | n.p.                 | -              | -              | n.m.               | -              | -              | 1450.7       | 0.3            | 2              | 1520.9        | 0.3            | 2               | -             |
| A-VIII | n.m.                 | -              | -              | n.p.               | -              | -              | 1420.2       | 0.1            | 2              | 1515.0        | 0              | 2               | -             |
| A-IX   | n.p.                 | -              | -              | n.p.               | -              | -              | 1407.6       | 1.2            | 2              | 1512.8        | 0              | 2               | -             |
| A-X    | n.p.                 | -              | -              | n.p.               | -              | -              | 1348.9       | 0.1            | 2              | 1502.6        | 0.1            | 2               | -             |
| A-XI   | n.p.                 | -              | -              | n.p.               | -              | -              | 1321.5       | 0.7            | 2              | 1497.1        | 0.3            | 2               | -             |

**Table S-II:** (continued)

| Alloy   | $\delta$ -Form.<br>[°C] | Std.<br>Dev.<br>[°C] | Typ.<br>Err.<br>[°C] | $\gamma$ -End<br>[°C] | Std.<br>Dev.<br>[°C] | Typ.<br>Err.<br>[°C] | L-Form.<br>[°C] | Std.<br>Dev.<br>[°C] | Typ.<br>Err.<br>[°C] | Liquidus<br>[°C] | Std.<br>Dev.<br>[°C] | Typ.<br>Error<br>[°C] | Phase<br>transf. |
|---------|-------------------------|----------------------|----------------------|-----------------------|----------------------|----------------------|-----------------|----------------------|----------------------|------------------|----------------------|-----------------------|------------------|
| A-XII   | n.p.                    | -                    | -                    | n.p.                  | -                    | -                    | 1189.5          | 1.5                  | 2                    | 1468.1           | 0.9                  | 2                     | -                |
| A-XIII  | n.p.                    | -                    | -                    | n.p.                  | -                    | -                    | 1108.3          | 0.8                  | 2                    | 1452.4           | 0.6                  | 2                     | -                |
| A-XIV   | n.p.                    | -                    | -                    | n.p.                  | -                    | -                    | 1039.7          | 0.3                  | 2                    | 1405.1           | 0.1                  | 2                     | eutectic         |
| A-XV    | n.p.                    | -                    | -                    | n.p.                  | -                    | -                    | 1042.1          | 0.5                  | 2                    | 1316.2           | 1.8                  | 5                     | eutectic         |
| A-XVI   | n.p.                    | -                    | -                    | n.p.                  | -                    | -                    | 1039.1          | 0.9                  | 2                    | 1273.9           | 0.6                  | 5                     | eutectic         |
| A-XVII  | n.p.                    | -                    | -                    | n.p.                  | -                    | -                    | 1038.8          | 0                    | 2                    | 1206.2           | 2.1                  | 5                     | eutectic         |
| A-XVIII | n.p.                    | -                    | -                    | n.p.                  | -                    | -                    | 1037.2          | 0.3                  | 2                    | 1134.8           | 0                    | 5                     | eutectic         |
| B-I     | 1359.4                  | 1.7                  | 5                    | 1373.0                | 1.7                  | 10                   | 1513.9          | 1.1                  | 2                    | 1531.1           | 0.5                  | 2                     | left of cA       |
| B-II    | 1380.1                  | 0.5                  | 5                    | 1421.2                | 0.8                  | 10                   | 1501.8          | 0.5                  | 2                    | 1529.3           | 0                    | 2                     | left of cA       |
| B-III   | 1401.3                  | 0.2                  | 5                    | 1452.9                | 0.7                  | 10                   | 1486.9          | 0.9                  | 2                    | 1527.5           | 0.3                  | 2                     | left of cA       |
| B-IV    | 1429.1                  | 0.2                  | 5                    | 1479.0                | 0.2                  | 10                   | 1471.9          | 0.4                  | 5                    | 1524.6           | 0                    | 2                     | cA-cB            |
| B-V     | 1425.5                  | 0                    | 5                    | 1477.9                | 0                    | 10                   | 1472.4          | 0                    | 5                    | 1525.1           | 0                    | 2                     | cA-cB            |
| B-VI    | 1452.4                  | 2.6                  | 5                    | 1482.7                | 0.8                  | 10                   | 1475.2          | 0.2                  | 5                    | 1520.6           | 0.2                  | 2                     | cA-cB            |
| B_VII   | 1480.6                  | 0.1                  | 5                    | 1485.8                | 0.2                  | 10                   | 1448.3          | 2.3                  | 5                    | 1515.9           | 0.2                  | 2                     | cB-cC            |
| B-VIII  | 1487.6                  | 0                    | 5                    | 1488.3                | 0.1                  | 10                   | 1424.8          | 0.1                  | 5                    | 1507.6           | 0.2                  | 2                     | cB-cC            |
| B-IX    | 1490.0                  | 0.1                  | 5                    | 1490.4                | 0.5                  | 10                   | 1410.6          | 1.9                  | 5                    | 1500.8           | 0.4                  | 2                     | cB-cC            |
| B-X     | n.p.                    | -                    | -                    | n.p.                  | -                    | 10                   | 1357.7          | 2.1                  | 5                    | 1478.3           | 1.1                  | 2                     | right of cC      |
| B-XI    | n.p.                    | -                    | -                    | n.p.                  | -                    | 10                   | 1303.1          | 2.1                  | 5                    | 1457.8           | 1.1                  | 2                     | right of cC      |
| B-XII   | n.p.                    | -                    | -                    | n.p.                  | -                    | 10                   | 1234.4          | 1.1                  | 5                    | 1427.7           | 1.1                  | 2                     | right of cC      |
| C-I     | 1486.9                  | 0.4                  | 5                    | 1489.8                | 0.1                  | 10                   | 1460.7          | 0.4                  | 5                    | 1517.5           | 0.3                  | 2                     | cB-cC            |
| C-II    | 1480.1                  | 0.4                  | 5                    | 1485.9                | 0.1                  | 10                   | 1445.5          | 1.4                  | 5                    | 1516.3           | 0.1                  | 2                     | cB-cC            |
| C-III   | 1472.4                  | 0                    | 5                    | 1481.5                | 0.8                  | 10                   | 1428.5          | 0.1                  | 5                    | 1514.6           | 0                    | 2                     | cB-cC            |

**Table S-III:** Detailed chemical analysis of investigated samples and phase transformation temperatures (part I), Fe-C-P with mass pct. ration C/P is 2

| Alloy | Fe wt%  | C wt%        | Si wt% | Mn wt% | P wt%        | S wt%  | Al wt% | N wt%  | $\gamma$ -Form. [°C] | Std. Dev. [°C] | Typ. Err. [°C] | $\sigma$ -End [°C] | Std. Dev. [°C] | Typ. Err. [°C] | $\delta$ -Form. [°C] | Std. Dev. [°C] | Typ. Err. [°C] |
|-------|---------|--------------|--------|--------|--------------|--------|--------|--------|----------------------|----------------|----------------|--------------------|----------------|----------------|----------------------|----------------|----------------|
| D-I   | 99.3288 | <b>0.170</b> | 0.002  | 0.015  | <b>0.430</b> | 0.0034 | 0.026  | 0.0028 | 744.7                | 0.3            | 5              | n.m.               | -              | 5              | 1416.9               | 2.1            | 5              |
| D-II  | 98.8321 | <b>0.340</b> | 0.002  | 0.015  | <b>0.760</b> | 0.0035 | 0.024  | 0.0024 | 749.8                | 0.4            | 5              | n.m.               | -              | 5              | 1457.1               | 0.8            | 5              |
| D-III | 97.9659 | <b>0.680</b> | 0.002  | 0.016  | <b>1.275</b> | 0.0034 | 0.031  | 0.0057 | 759.6                | 1.3            | 5              | 777.8              | 0.6            | 5              | n.p.                 | -              | -              |
| D-IV  | 95.5927 | <b>1.360</b> | 0.004  | 0.018  | <b>2.960</b> | 0.0037 | 0.027  | 0.0146 | 762.5                | 0.9            | 5              | n.m.               | -              | -              | n.p.                 | -              | -              |

**Table S-IV:** Detailed chemical analysis of investigated samples and phase transformation temperatures (part II), Fe-C-P with mass pct. ration C/P is 2

| Alloy | $\gamma$ -End [°C] | Std. Dev. [°C] | Typ. Err. [°C] | L-Form. [°C] | Std. Dev. [°C] | Typ. Err. [°C] | Fe <sub>3</sub> P-End [°C] | Std. Dev. [°C] | Typ. Err. [°C] | Liquidus [°C] | Std. Dev. [°C] | Typ. Err. [°C] | Solidif.                       |
|-------|--------------------|----------------|----------------|--------------|----------------|----------------|----------------------------|----------------|----------------|---------------|----------------|----------------|--------------------------------|
| D-I   | 1456.6             | 0              | 5              | 1359.1       | 3.3            | 2              | -                          | 3.3            | -              | 1507.0        | 0.4            | 2              | c <sub>B</sub> -c <sub>C</sub> |
| D-II  | 1460.3             | 0.6            | 5              | 1194.2       | 0.2            | 10             | -                          | 0.2            | -              | 1481.7        | 0.9            | 2              | c <sub>B</sub> -c <sub>C</sub> |
| D-III | n.p.               | -              | -              | 996.4        | 0.8            | 2              | 1002.7                     | 0.2            | 2              | 1421.7        | 0.7            | 2              | -                              |
| D-IV  | n.p.               | -              | -              | 956.2        | 0.4            | 2              | 967.8                      | 1.3            | 2              | 1319.55       | 3.8            | 10             | eutectic                       |

## Legend

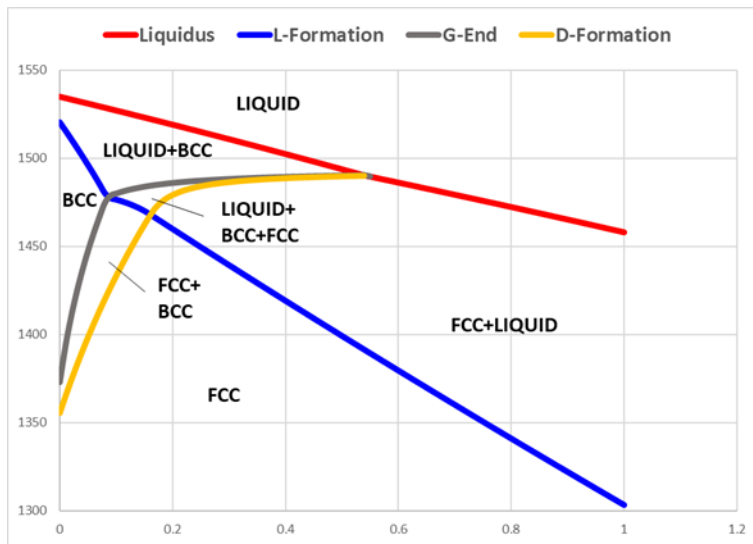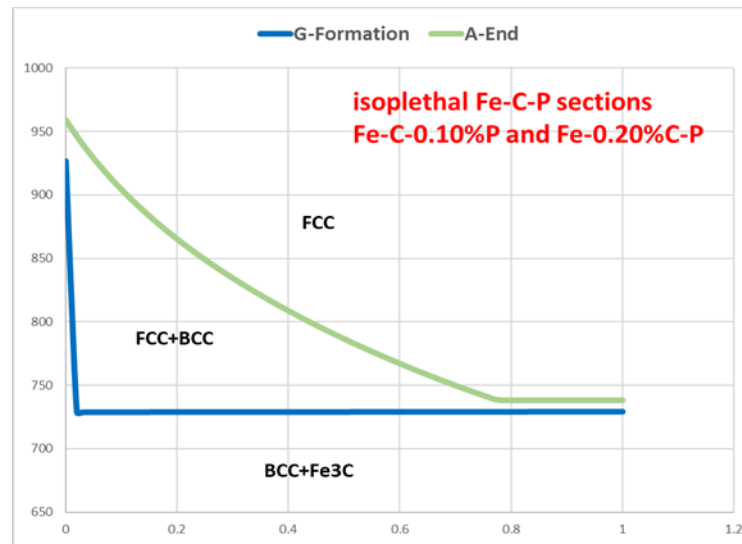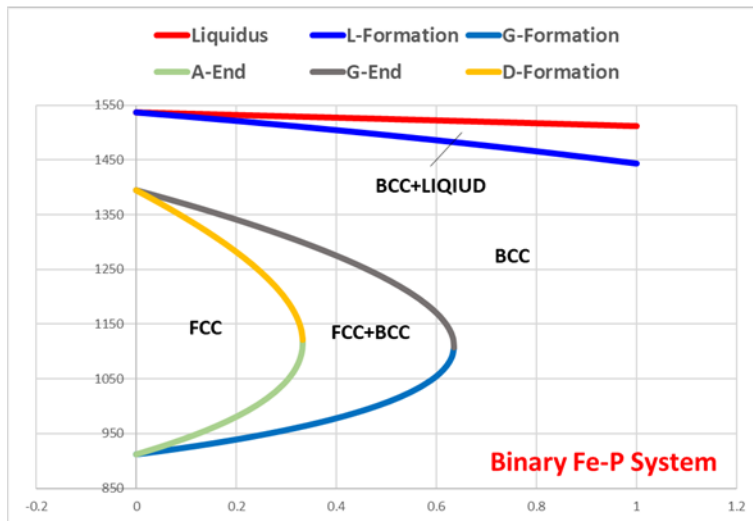

| Legend     |                                                                      |
|------------|----------------------------------------------------------------------|
| n.p.       | phase transformation not present according to phase diagram          |
| n.m.       | phase transformation not measurable by DSC                           |
| Std. Dev.  | Standard Deviation from at least 2 independent measurements          |
| Typ. Error | Suggested typical error for consideration in thermodynamic databases |
